# Supplementary material
Source: HighWire-hosted journal article supplement (https://diabetes.diabetesjournals.org/content/suppl/2007/08/08/db07-0177)
Supplement: db070177OnlineAppendix.pdf [file db070177OnlineAppendix.pdf]

## Suppl. Fig. 1

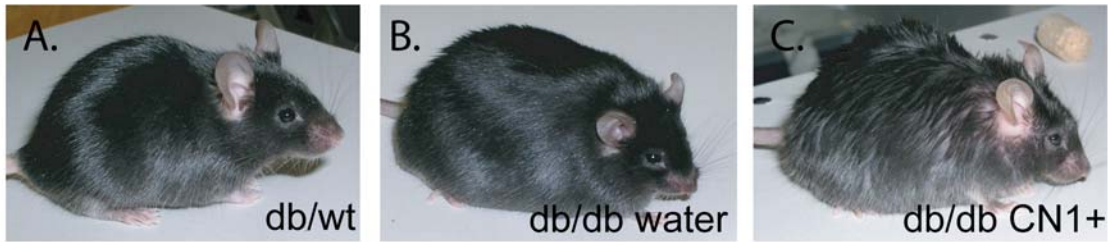

### **Suppl. Figure 1 Phenotype of hCN1 transgenic *db/db* mice aged 22 weeks**

**A.** Nontransgenic, nondiabetic *db/wt* control mouse (*db/wt*). This mouse is slim and without apparent phenotype. **B.** Nontransgenic, diabetic *db/db* mouse (*db/db* water). This mouse is obese and diabetic. **C.** HCN1 transgenic *db/db* mouse (*db/db* CN1+). This mouse is wasted. The fur is disheveled and buckling can be observed.
